# Supplementary material for: The Impact of Caesarean Section on the Risk of Childhood Overweight and Obesity: New Evidence from a Contemporary Cohort Study
Source: PubMed Central journal article supplement (PMC6181954; doi:10.1038/s41598-018-33482-z), 2018-10-11
Supplement: 41598_2018_33482_MOESM1_ESM.pdf [file 41598_2018_33482_MOESM1_ESM.pdf]

## **Supplementary Information**

The Impact of Caesarean Section on the Risk of Childhood Overweight and Obesity: New Evidence from a Contemporary Cohort Study

Gwinyai Masukume<sup>1</sup>, Sinéad M O'Neill<sup>1</sup>, Philip N Baker<sup>2</sup>, Louise C Kenny<sup>3</sup>, Susan MB Morton<sup>4</sup>, Ali S Khashan<sup>1,5,\*</sup>

<sup>1</sup>The Irish Centre for Fetal and Neonatal Translational Research (INFANT), Department of Obstetrics and Gynaecology, University College Cork, Cork, Ireland

<sup>2</sup>College of Life Sciences, University of Leicester, Leicester, United Kingdom

<sup>3</sup>Department of Women's and Children's Health, Faculty of Health and Life Sciences, University of Liverpool, Liverpool, United Kingdom

<sup>4</sup>Centre for Longitudinal Research, University of Auckland, Auckland, New Zealand

<sup>5</sup>School of Public Health, University College Cork, Cork, Ireland

### **Corresponding author:**

\*Ali Khashan: a.khashan@ucc.ie

**Supplementary Table S1.** Mode of delivery and body mass index at age 3 years, Appropriate for Gestational Age (AGA).

| BMI category (normal BMI – base outcome) | n   | RRR (95% CI)     | p-value | AdjRRR (95% CI)** | p-value |
|------------------------------------------|-----|------------------|---------|-------------------|---------|
| <b>Thin</b>                              |     |                  |         |                   |         |
| Normal vaginal delivery                  | 188 | reference        |         | reference         |         |
| Assisted vaginal delivery                | 32  | 0.71 (0.48-1.04) | 0.050   | 0.62 (0.42-0.92)  | 0.018   |
| Elective Caesarean                       | 27  | 0.63 (0.41-0.96) | 0.067   | 0.62 (0.40-0.94)  | 0.023   |
| Emergency Caesarean                      | 36  | 0.92 (0.65-1.33) | 0.977   | 0.84 (0.58-1.21)  | 0.354   |
| <b>Overweight</b>                        |     |                  |         |                   |         |
| Normal vaginal delivery                  | 776 | reference        |         | reference         |         |
| Assisted vaginal delivery                | 203 | 1.04 (0.87-1.24) | 0.601   | 1.08 (0.90-1.30)  | 0.384   |
| Elective Caesarean                       | 151 | 0.99 (0.81-1.20) | 0.408   | 1.00 (0.82-1.21)  | 0.962   |
| Emergency Caesarean                      | 170 | 1.17 (0.97-1.41) | 0.178   | 1.21 (0.99-1.47)  | 0.057   |
| <b>Obese</b>                             |     |                  |         |                   |         |
| Normal vaginal delivery                  | 205 | reference        |         | reference         |         |
| Assisted vaginal delivery                | 52  | 1.02 (0.74-1.39) | 0.923   | 1.03 (0.74-1.44)  | 0.861   |
| Elective Caesarean                       | 42  | 1.15 (0.69-1.37) | 0.862   | 1.15 (0.81-1.64)  | 0.426   |
| Emergency Caesarean                      | 61  | 1.66 (1.15-2.08) | 0.004   | 1.67 (1.22-2.29)  | 0.001   |

N for adjusted model = 7001. Multinomial logistic regression. BMI – Body mass index, RRR (Relative Risk Ratio), CI (Confidence intervals), Adj (Adjusted).

\*\*Adjusted for maternal age, education, ethnicity, marital status, region, infant sex, gestational age, pre-eclampsia, gestational diabetes, parity.

**Supplementary Table S2.** Mode of delivery and body mass index at age 3 years, AGA, restricted to non-macrosomic.

| BMI category (normal BMI – base outcome) | AdjRRR (95% CI)**   | p-value |
|------------------------------------------|---------------------|---------|
| <b>Thin</b>                              |                     |         |
| Normal vaginal delivery                  | reference           |         |
| Assisted vaginal delivery                | 0.65 (0.44-0.97)    | 0.036   |
| Elective Caesarean                       | 0.62 (0.40-0.94)    | 0.025   |
| Emergency Caesarean                      | 0.83 (0.57-1.22)    | 0.341   |
| <b>Overweight</b>                        |                     |         |
| Normal vaginal delivery                  | reference           |         |
| Assisted vaginal delivery                | 1.07 (0.88-1.31)    | 0.473   |
| Elective Caesarean                       | 1.00 (0.82-1.23)    | 0.991   |
| Emergency Caesarean                      | 1.15 (0.93-1.42)    | 0.195   |
| <b>Obese</b>                             |                     |         |
| Normal vaginal delivery                  | reference           |         |
| Assisted vaginal delivery                | 1.08 (0.76-1.53)    | 0.682   |
| Elective Caesarean                       | 0.99 (0.67-1.45)*** | 0.953   |
| Emergency Caesarean                      | 1.77 (1.26-2.47)    | 0.001   |

N for adjusted model = 6321. Multinomial logistic regression. BMI – Body mass index, RRR (Relative Risk Ratio), CI (Confidence intervals), Adj (Adjusted).

\*\*Adjusted for maternal age, education, ethnicity, marital status, region, infant sex, gestational age, pre-eclampsia, gestational diabetes, parity. \*\*\*0.96 (0.66-1.41) when birth weight added.

**Supplementary Table S3.** Mode of delivery and body mass index at age 3 years, Large for Gestational Age.

| BMI category (normal BMI – base outcome) | n   | RRR (95% CI)     | p-value | AdjRRR (95% CI)** | p-value |
|------------------------------------------|-----|------------------|---------|-------------------|---------|
| <b>Thin</b>                              |     |                  |         |                   |         |
| Normal vaginal delivery                  | 21  | reference        |         | reference         |         |
| Assisted vaginal delivery                | 3   | 0.74 (0.48-1.04) | 0.050   | 0.95 (0.26-3.44)  | 0.933   |
| Elective Caesarean                       | 4   | 0.66 (0.41-0.96) | 0.067   | 1.04 (0.35-3.15)  | 0.939   |
| Emergency Caesarean                      | 8   | 1.34 (0.65-1.33) | 0.977   | 1.28 (0.49-3.30)  | 0.614   |
| <b>Overweight</b>                        |     |                  |         |                   |         |
| Normal vaginal delivery                  | 140 | reference        |         | reference         |         |
| Assisted vaginal delivery                | 27  | 1.00 (0.87-1.24) | 0.601   | 1.01 (0.62-1.66)  | 0.963   |
| Elective Caesarean                       | 51  | 1.26 (0.81-1.20) | 0.408   | 1.35 (0.90-2.01)  | 0.143   |
| Emergency Caesarean                      | 50  | 1.26 (0.97-1.41) | 0.178   | 1.51 (1.00-2.29)  | 0.049   |
| <b>Obese</b>                             |     |                  |         |                   |         |
| Normal vaginal delivery                  | 41  | reference        |         | reference         |         |
| Assisted vaginal delivery                | 10  | 1.27 (0.74-1.39) | 0.923   | 1.19 (0.54-2.62)  | 0.666   |
| Elective Caesarean                       | 23  | 1.94 (0.69-1.37) | 0.862   | 2.01 (1.10-3.67)  | 0.022   |
| Emergency Caesarean                      | 16  | 1.37 (1.15-2.08) | 0.004   | 1.60 (0.80-3.20)  | 0.180   |

N for adjusted model = 1028. Multinomial logistic regression. BMI – Body mass index, RRR (Relative Risk Ratio), CI (Confidence intervals), Adj (Adjusted).

\*\*Adjusted for maternal age, education, ethnicity, marital status, region, infant sex, gestational age, pre-eclampsia, gestational diabetes.

**Supplementary Table S4.** Mode of delivery and body mass index at age 3 years, Small for Gestational Age.

| BMI category (normal BMI – base outcome) | n   | RRR (95% CI)     | p-value | AdjRRR (95% CI)** | p-value |
|------------------------------------------|-----|------------------|---------|-------------------|---------|
| <b>Thin</b>                              |     |                  |         |                   |         |
| Normal vaginal delivery                  | 56  | reference        |         | reference         |         |
| Assisted vaginal delivery                | 21  | 1.37 (0.80-2.33) | 0.250   | 1.40 (0.79-2.51)  | 0.251   |
| Elective Caesarean                       | 16  | 1.72 (0.95-3.12) | 0.075   | 1.36 (0.70-2.64)  | 0.368   |
| Emergency Caesarean                      | 20  | 1.43 (0.83-2.46) | 0.198   | 1.25 (0.70-2.26)  | 0.454   |
| <b>Overweight</b>                        |     |                  |         |                   |         |
| Normal vaginal delivery                  | 109 | reference        |         | reference         |         |
| Assisted vaginal delivery                | 18  | 0.60 (0.35-1.02) | 0.060   | 0.64 (0.37-1.10)  | 0.108   |
| Elective Caesarean                       | 23  | 1.27 (0.77-2.09) | 0.348   | 1.51 (0.87-2.60)  | 0.140   |
| Emergency Caesarean                      | 31  | 1.14 (0.73-1.76) | 0.565   | 1.31 (0.83-2.07)  | 0.238   |
| <b>Obese</b>                             |     |                  |         |                   |         |
| Normal vaginal delivery                  | 24  | reference        |         | reference         |         |
| Assisted vaginal delivery                | 5   | 0.76 (0.28-2.02) | 0.581   | 0.90 (0.34-2.43)  | 0.840   |
| Elective Caesarean                       | 6   | 1.50 (0.60-3.78) | 0.384   | 2.73 (0.99-7.51)  | 0.053   |
| Emergency Caesarean                      | 5   | 0.83 (0.31-2.22) | 0.716   | 1.17 (0.43-3.18)  | 0.755   |

N for adjusted model = 1301. Multinomial logistic regression. BMI – Body mass index, RRR (Relative Risk Ratio), CI (Confidence intervals), Adj (Adjusted).

\*\*Adjusted for maternal age, education, ethnicity, marital status, region, infant sex, gestational age, pre-eclampsia, gestational diabetes, parity.

**Supplementary Table S5.** Sensitivity analyses by various variables.

| BMI category (normal BMI – base outcome) | AdjRRR (95% CI)** | p-value |
|------------------------------------------|-------------------|---------|
| Obese                                    |                   |         |
| Normal vaginal delivery                  | reference         |         |
| Elective Caesarean*                      | 1.39 (0.25-7.80)  | 0.707   |
| Elective Caesarean**                     | 2.70 (0.76-9.52)  | 0.123   |
| Elective Caesarean***                    | 1.17 (0.74-1.86)  | 0.497   |
| Elective Caesarean****                   | 1.28 (0.85-1.91)  | 0.237   |
| Elective Caesarean*****                  | 1.38 (0.95-1.99)  | 0.091   |

\*pre-term < 37 weeks (N=386), \*\*pre-eclampsia (N=460), \*\*\* mothers < 35 years old (N=4601), \*\*\*\*males (N= 4795), \*\*\*\*\*females (N= 4671)

**Supplementary Table S6.** Mode of delivery and body mass index at age 5 years, AGA, restricted to non-macrosomic.

| BMI category (normal BMI – base outcome) | AdjRRR (95% CI)** | p-value |
|------------------------------------------|-------------------|---------|
| <b>Thin</b>                              |                   |         |
| Normal vaginal delivery                  | reference         |         |
| Assisted vaginal delivery                | 0.98 (0.71-1.35)  | 0.899   |
| Elective Caesarean                       | 0.60 (0.40-0.89)  | 0.012   |
| Emergency Caesarean                      | 1.07 (0.76-1.50)  | 0.693   |
| <b>Overweight</b>                        |                   |         |
| Normal vaginal delivery                  | reference         |         |
| Assisted vaginal delivery                | 1.16 (0.94-1.44)  | 0.168   |
| Elective Caesarean                       | 1.04 (0.83-1.31)  | 0.729   |
| Emergency Caesarean                      | 1.26 (1.00-1.58)  | 0.048   |
| <b>Obese</b>                             |                   |         |
| Normal vaginal delivery                  | reference         |         |
| Assisted vaginal delivery                | 0.90 (0.60-1.35)  | 0.610   |
| Elective Caesarean                       | 1.26 (0.86-1.84)  | 0.231   |
| Emergency Caesarean                      | 1.56 (1.06-2.29)  | 0.024   |

N for adjusted model = 5889. Multinomial logistic regression. BMI – Body mass index, RRR (Relative Risk Ratio), CI (Confidence intervals), Adj (Adjusted).

\*\*Adjusted for maternal age, education, ethnicity, marital status, region, infant sex, gestational age, pre-eclampsia, gestational diabetes, parity.

**Supplementary Table S7.** Mode of delivery and BMI category transition between ages three and five.

| Transition (remained normal – base outcome) | Cases<br>n (%) | RRR (95% CI)     | p-value | AdjRRR (95% CI)** | p-value |
|---------------------------------------------|----------------|------------------|---------|-------------------|---------|
| <b>Remained obese</b>                       |                |                  |         |                   |         |
| Normal vaginal delivery                     | 97 (1.1)       | reference        |         | reference         |         |
| Assisted vaginal delivery                   | 18 (0.2)       | 0.74 (0.44-1.22) | 0.237   | 0.79 (0.47-1.34)  | 0.385   |
| Elective Caesarean                          | 28 (0.3)       | 1.32 (0.86-2.02) | 0.209   | 1.51 (0.98-2.33)  | 0.063   |
| Emergency Caesarean                         | 32 (0.4)       | 1.63 (1.08-2.45) | 0.019   | 1.74 (1.14-2.69)  | 0.011   |
| <b>Became obese</b>                         |                |                  |         |                   |         |
| Normal vaginal delivery                     | 155 (1.8)      | reference        |         | reference         |         |
| Assisted vaginal delivery                   | 30 (0.3)       | 0.77 (0.51-1.14) | 0.193   | 0.86 (0.57-1.29)  | 0.452   |
| Elective Caesarean                          | 37 (0.4)       | 1.09 (0.75-1.57) | 0.652   | 1.15 (0.79-1.67)  | 0.464   |
| Emergency Caesarean                         | 40 (0.5)       | 1.28 (0.89-1.83) | 0.183   | 1.37 (0.95-1.97)  | 0.096   |
| <b>Became non obese</b>                     |                |                  |         |                   |         |
| Normal vaginal delivery                     | 138 (1.6)      | reference        |         | reference         |         |
| Assisted vaginal delivery                   | 40 (0.5)       | 1.15 (0.80-1.65) | 0.450   | 1.32 (0.91-1.93)  | 0.147   |
| Elective Caesarean                          | 34 (0.4)       | 1.12 (0.76-1.65) | 0.553   | 1.20 (0.81-1.78)  | 0.357   |
| Emergency Caesarean                         | 44 (0.5)       | 1.58 (1.11-2.24) | 0.011   | 1.74 (1.21-2.49)  | 0.003   |
| <b>Other transition</b>                     |                |                  |         |                   |         |
| Normal vaginal delivery                     | 1833 (20.8)    | reference        |         | reference         |         |
| Assisted vaginal delivery                   | 449 (5.1)      | 0.97 (0.85-1.11) | 0.659   | 1.00 (0.87-1.14)  | 0.946   |
| Elective Caesarean                          | 383 (4.3)      | 0.95 (0.83-1.09) | 0.494   | 1.00 (0.86-1.15)  | 0.946   |
| Emergency Caesarean                         | 431 (4.9)      | 1.16 (1.01-1.33) | 0.031   | 1.20 (1.04-1.38)  | 0.013   |

N for adjusted model = 8819. Multinomial logistic regression. BMI – Body mass index, RRR (Relative Risk Ratio), CI (Confidence intervals), Adj (Adjusted). \*p-value<0.05.

\*\* Adjusted for maternal age, education, ethnicity, marital status, region, infant sex, gestational age, pre-eclampsia, gestational diabetes, parity.
